# Supplementary material for: Janus membranes with asymmetric cellular adhesion behaviors for regenerating eardrum perforation
Source: Royal Society of Chemistry journal article supplement (doi:10.1039/d1tb02418c), 2022-01-01
Supplement: d1tb02418c1.pdf [file d1tb02418c1.pdf]

## Supplementary Materials

# Janus Membranes with Asymmetric Cellular Adhesion Behaviors for Regenerating Eardrum Perforation

Zhili Zhang,<sup>†a</sup> Jin-Bo Li,<sup>†b</sup> Xu Li,<sup>c</sup> Cheng-Ye Zhu,<sup>c</sup> Liujie Ren,<sup>\*d</sup> Xiao-Jun Huang,<sup>\*c</sup>

Jian Wu,<sup>\*b</sup> Jian Ji,<sup>c</sup> Zhi-Kang Xu<sup>\*c</sup>

<sup>a</sup>*Department of Otorhinolaryngology Head and Neck Surgery, The first affiliated hospital of Zhejiang University School of Medicine, Hangzhou 310003, China.*

<sup>b</sup>*Department of Chemistry, Zhejiang University, Hangzhou 310027, China.*

<sup>c</sup>*MOE Key Laboratory of Macromolecular Synthesis and Functionalization, and Key Laboratory of Adsorption and Separation Materials & Technologies of Zhejiang Province, Department of Polymer Science and Engineering, Zhejiang University, Hangzhou 310027, China.*

<sup>d</sup>*Department of FPRS, Eye & ENT Hospital of Fudan University, Shanghai 200031, China.*

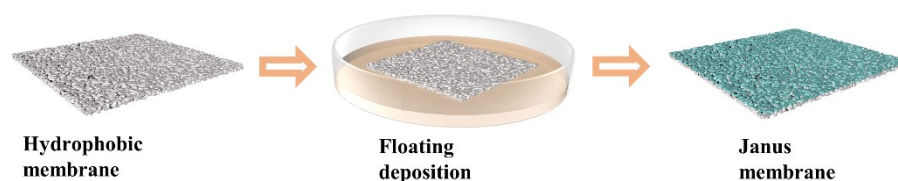

**Scheme S1.** Preparation process of Janus membranes.

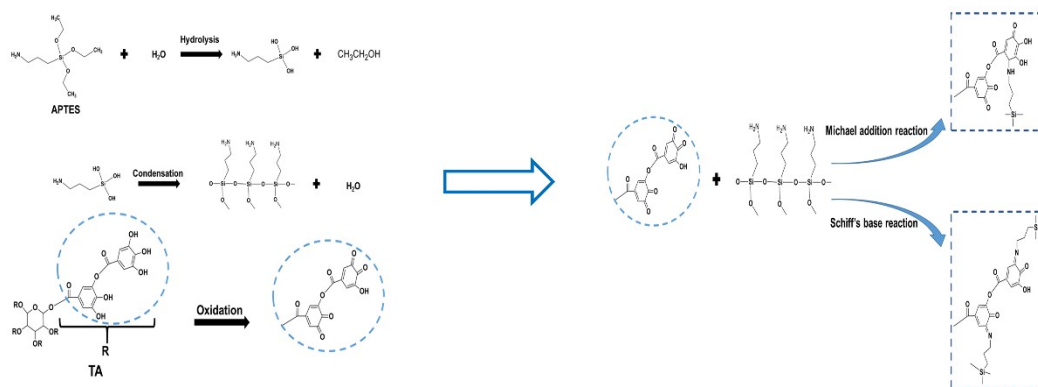

**Scheme S2.** Reaction mechanism of TA and APTES.

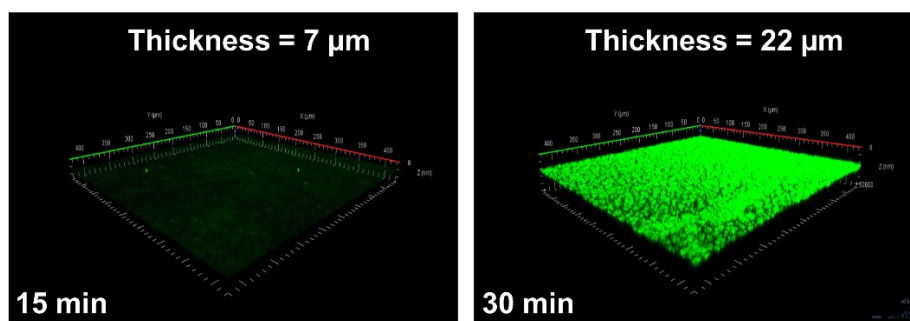

**Figure S1.** 3D LSCM images of JMs with different hydrophilization depths.

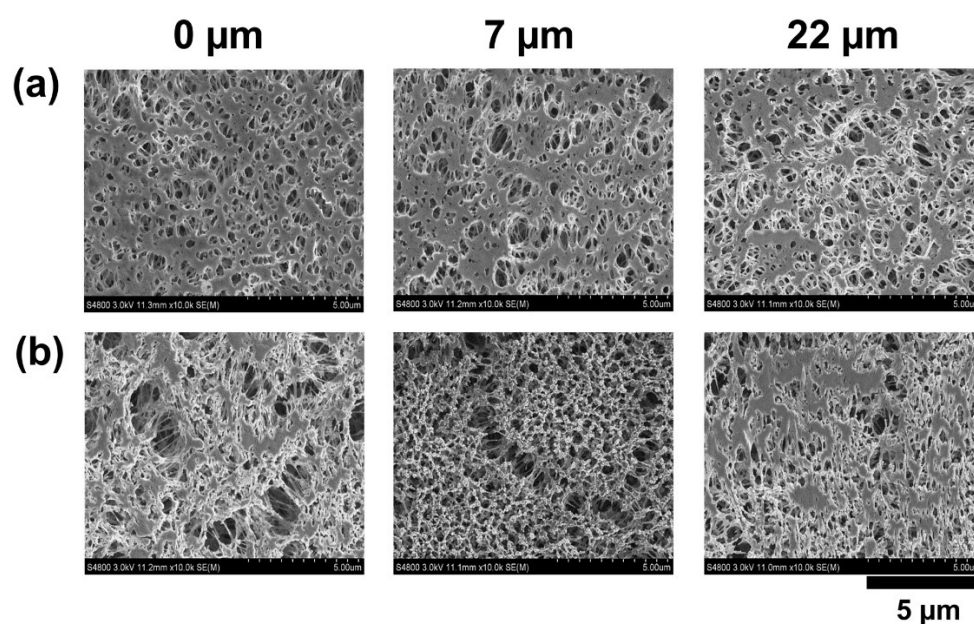

**Figure S2.** SEM images of JMs for (a) deposited surface and (b) undeposited surface with different hydrophilization depths.

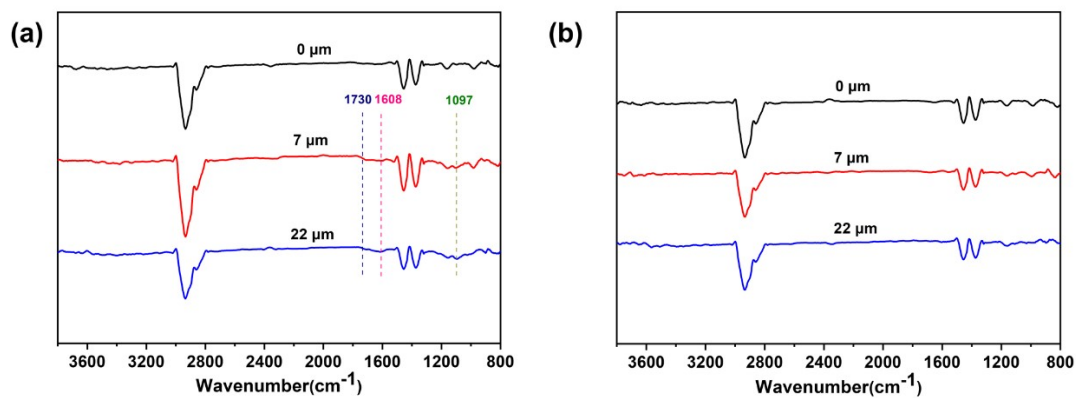

**Figure S3.** FT-IR/ATR spectra of JMs for (a) deposited surface and (b) undeposited surface with different hydrophilization depths.

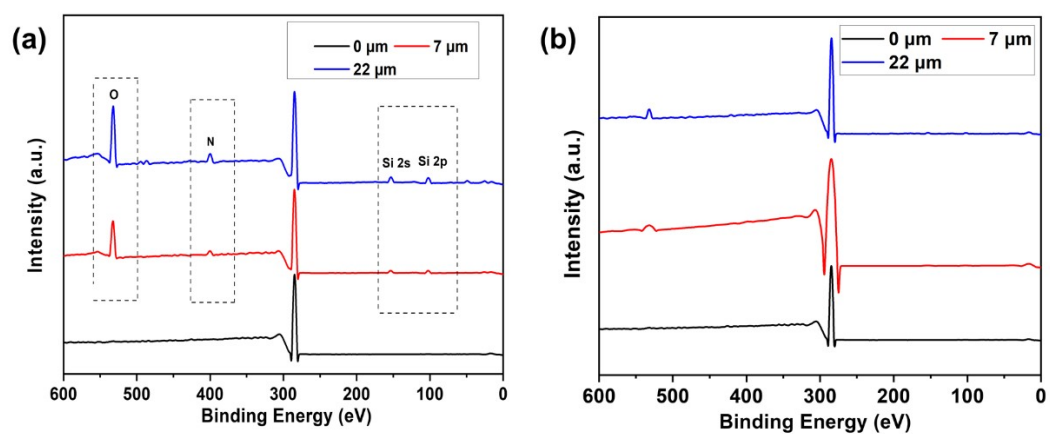

**Figure S4.** XPS spectra of JMs for (a) deposited surface and (b) undeposited surface with different hydrophilization depths.

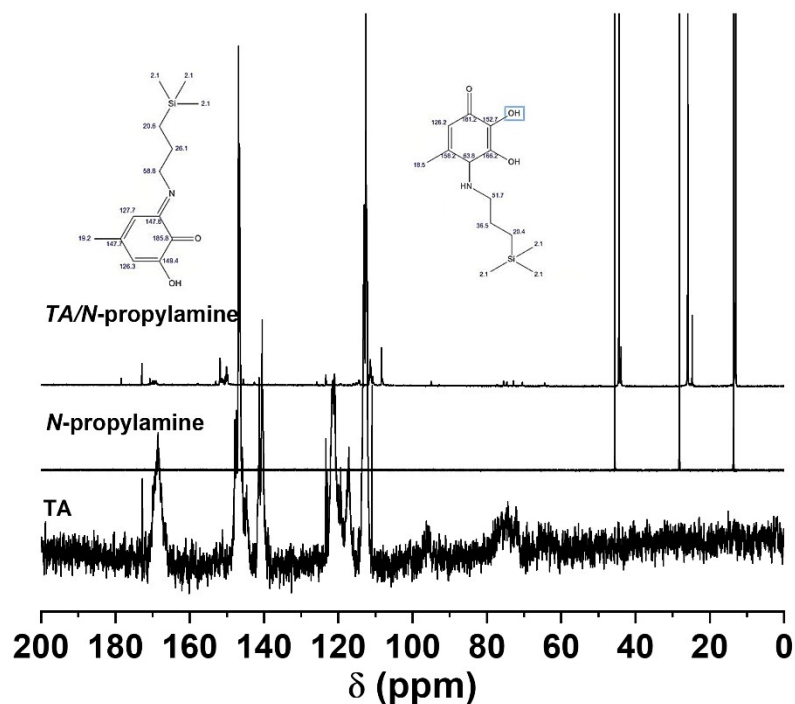

**Figure S5.**  $^{13}\text{C}$  NMR of TA, n-propylamine, and TA/of n-propylamine in  $\text{D}_2\text{O}$ . (The reaction time was 30 min)

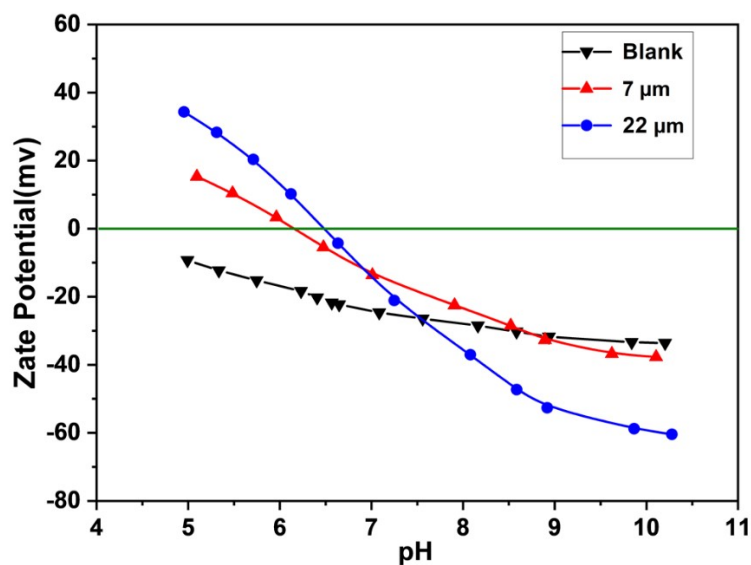

**Figure S6.** Surface zeta potential of JMs with different hydrophilization depths in different pH environments.

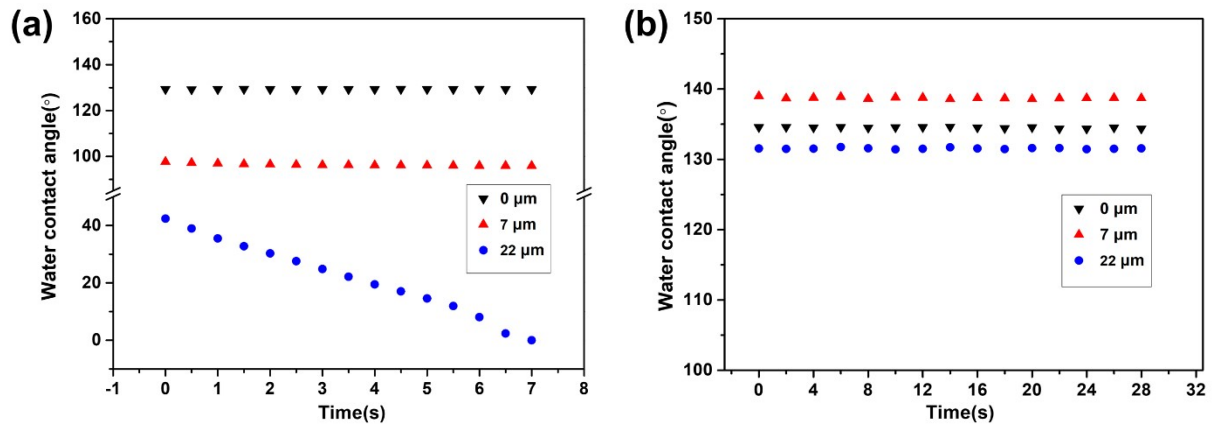

**Figure S7.** Dynamic water contact angle of JMs for (a) deposited surface and (b) undeposited surface with different hydrophilization depths.

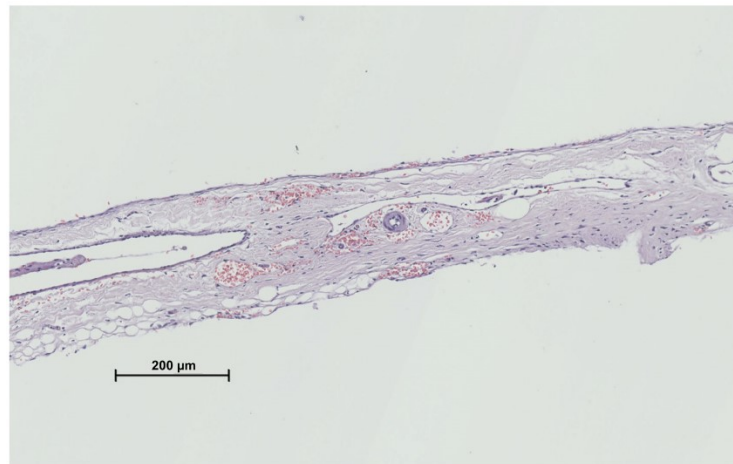

**Figure S8.** Histology of normal TM, 100 $\times$  magnification.
